# Supplementary material for: Heterojunction interfacial promotion of fast and prolonged alkali-ion storage of urchin-like Nb2O5@C nanospheres
Source: Royal Society of Chemistry journal article supplement (doi:10.1039/d1ta07270f), 2021-01-01
Supplement: d1ta07270f1.pdf [file d1ta07270f1.pdf]

## Heterojunction interfacial promotion of fast and prolonged alkali-ion storage of urchin-like Nb<sub>2</sub>O<sub>5</sub>@C nanospheres

Zhipeng Zhao<sup>a,b</sup>, Jingyun Cheng<sup>a,b</sup>, Kai Li<sup>a,b</sup>, Chuanqi Li<sup>a,b</sup>, Shuo Zhang<sup>c</sup>, Xiangdong Pei<sup>d</sup>, Zhulin Niu<sup>a,b\*</sup>, Zhongyi Liu<sup>a,b</sup>, Yongzhu Fu<sup>a,b</sup> and Dan Li<sup>a,b\*</sup>

<sup>a</sup> College of Chemistry, Zhengzhou University, Zhengzhou, Henan Province, 450001, P. R. China

<sup>b</sup> Green Catalysis Center, Zhengzhou University, Zhengzhou, Henan Province, 450001, P. R. China

<sup>c</sup> School of Nuclear Science and Technology, Lanzhou University, Lanzhou, Gansu Province, 730000, P. R. China

<sup>d</sup> Shanxi Supercomputing Center, Lvliang, Shanxi Province, 033000, P. R. China

\*Corresponding authors

E-mail: danli@zzu.edu.cn; niuzhl@zzu.edu.cn

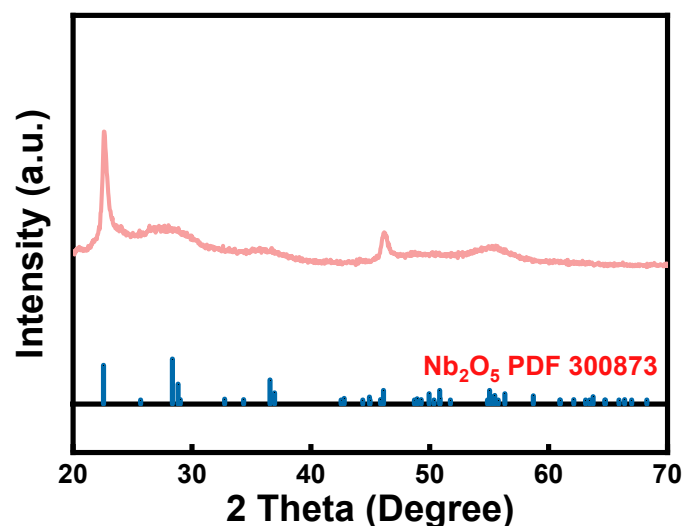

**Fig. S1.** The XRD pattern of the intermediate material obtained after the hydrothermal reaction, which is index to Nb<sub>2</sub>O<sub>5</sub> (PDF card no. 300873).

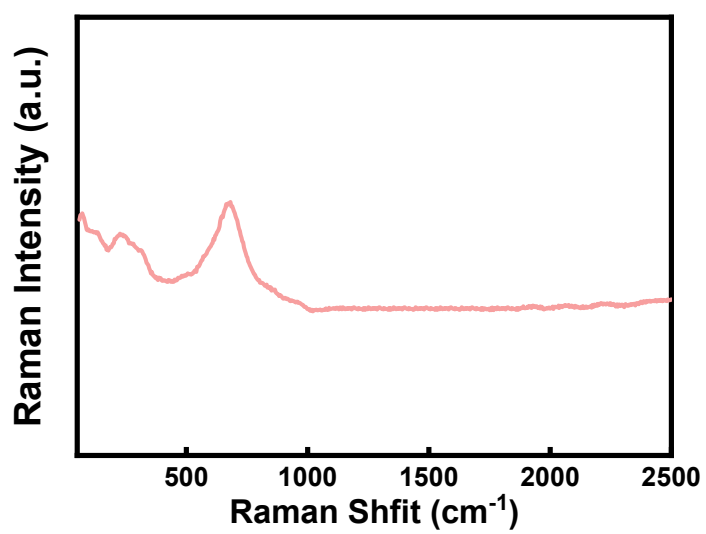

**Fig. S2.** The Raman spectrum of the intermediate material obtained after the hydrothermal reaction.

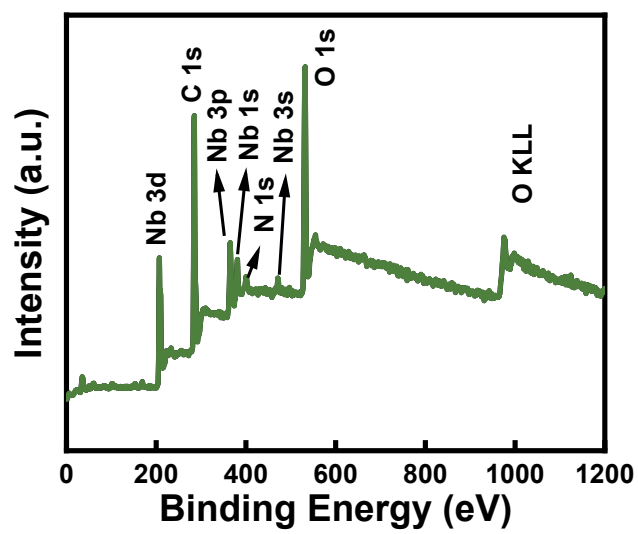

Fig. S3. Survey XPS spectrum of Nb<sub>2</sub>O<sub>5</sub>@C.

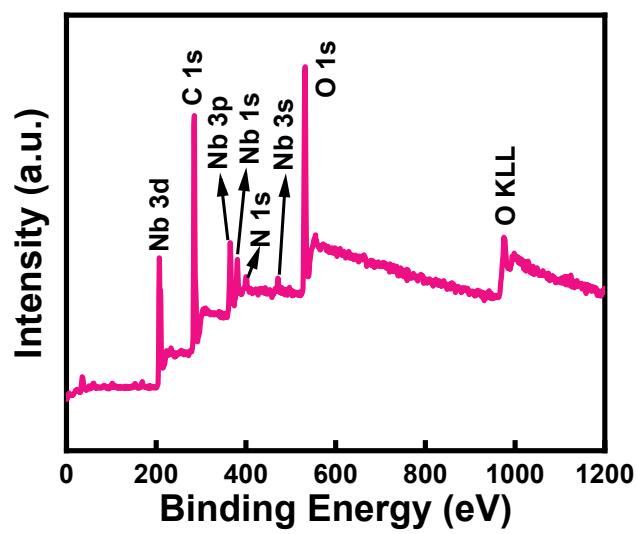

**Fig. S4.** Survey XPS spectrum of the bare Nb<sub>2</sub>O<sub>5</sub>.

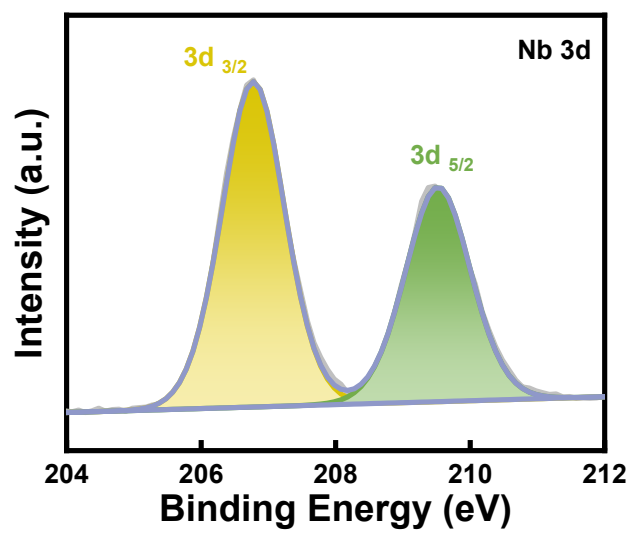

Fig. S5. High-resolution XPS spectrum of Nb 3d in the bare Nb<sub>2</sub>O<sub>5</sub>.

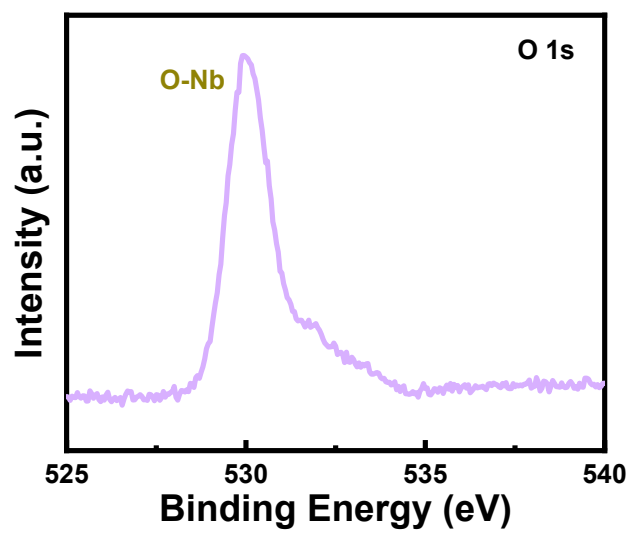

**Fig. S6.** High-resolution XPS spectrum of O 1s in the bare Nb<sub>2</sub>O<sub>5</sub>.

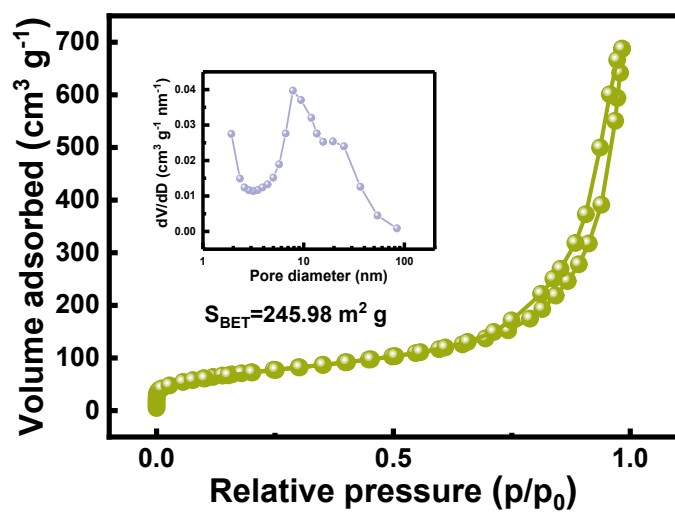

Fig. S7. Nitrogen sorption isotherms of the bare Nb<sub>2</sub>O<sub>5</sub>.

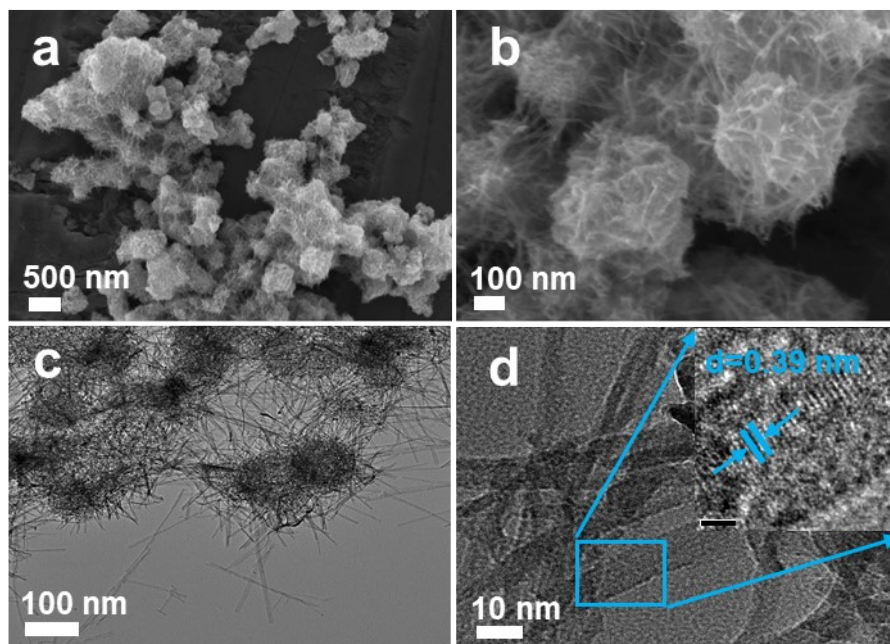

**Fig. S8.** a, b) SEM images and c, d) TEM images of the intermediate material obtained after the hydrothermal reaction.



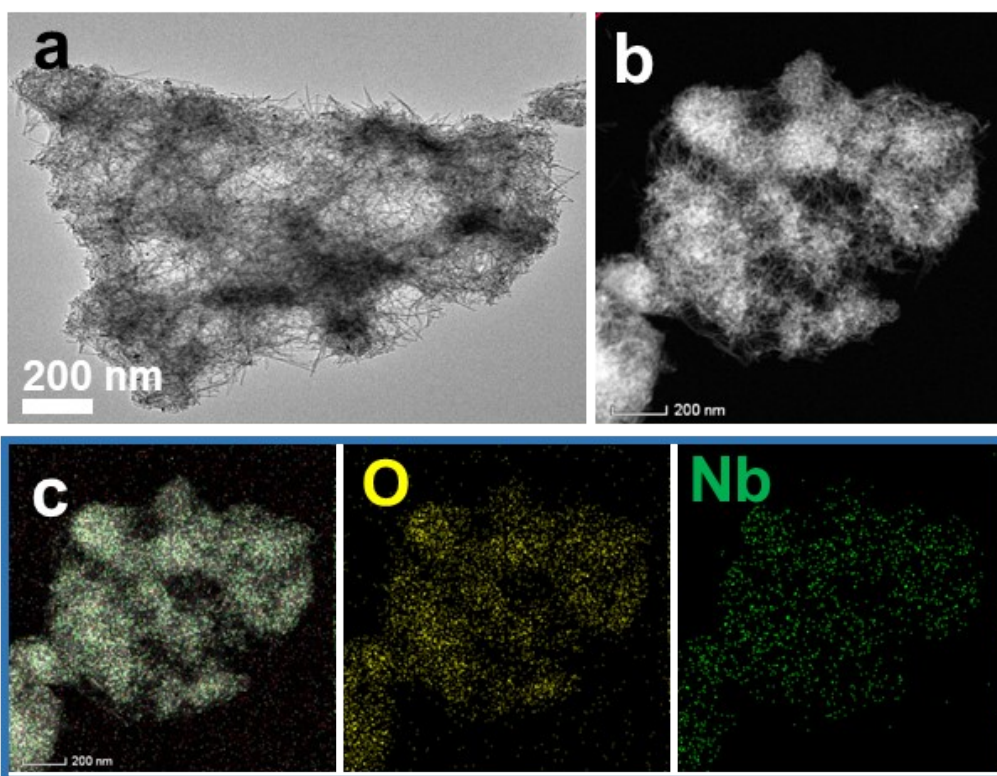

**Fig. S9.** (a) TEM image, (b) the HAADF image, and (c) elemental mapping images of O and Nb in the bare  $\text{Nb}_2\text{O}_5$ .

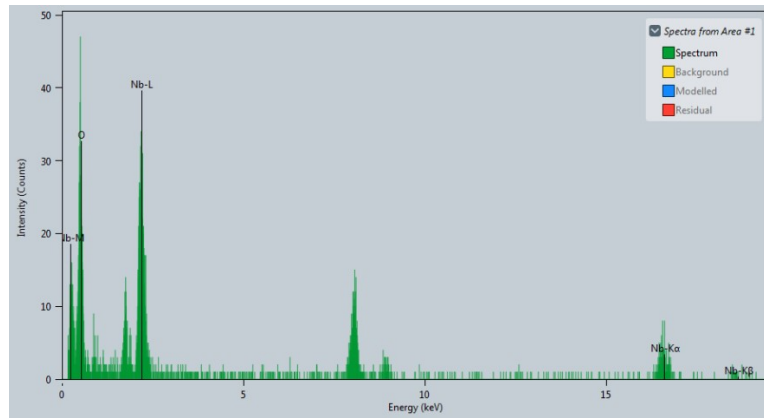

**Fig. S10.** The EDS of the bare Nb<sub>2</sub>O<sub>5</sub> sample.

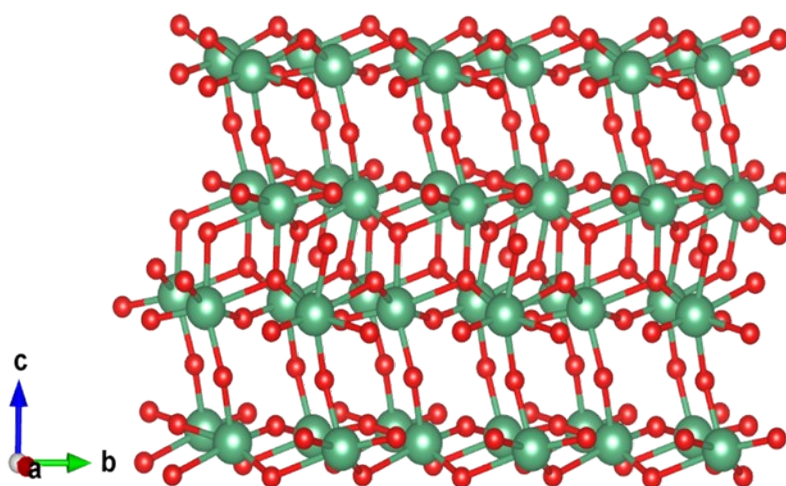

**Fig. S11.** The crystal structure of Nb<sub>2</sub>O<sub>5</sub>.

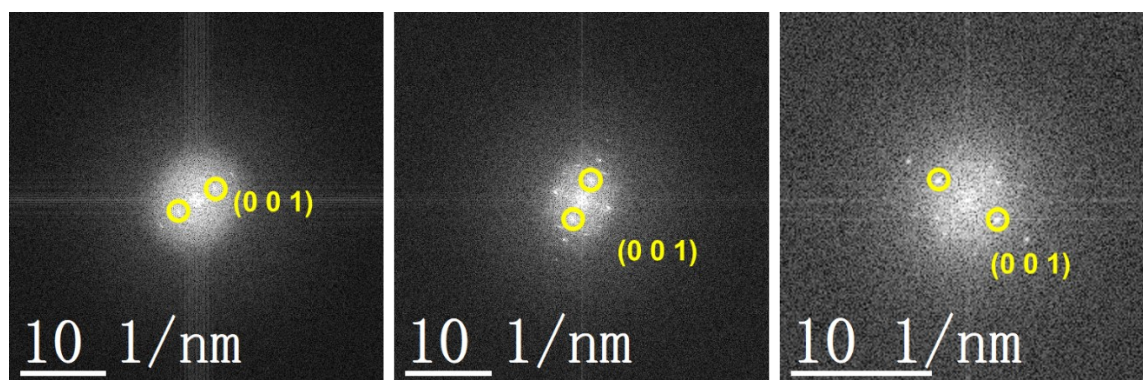

**Fig. S12.** The FFT diffraction pattern of obtained samples: a) the intermediate, b) bare  $\text{Nb}_2\text{O}_5$  and c)  $\text{Nb}_2\text{O}_5@\text{C}$ .

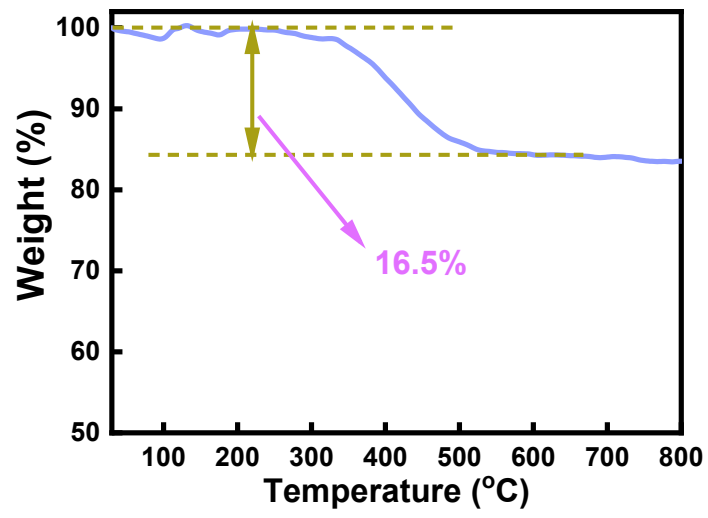

Fig. S13. The TG curve of Nb<sub>2</sub>O<sub>5</sub>@C.

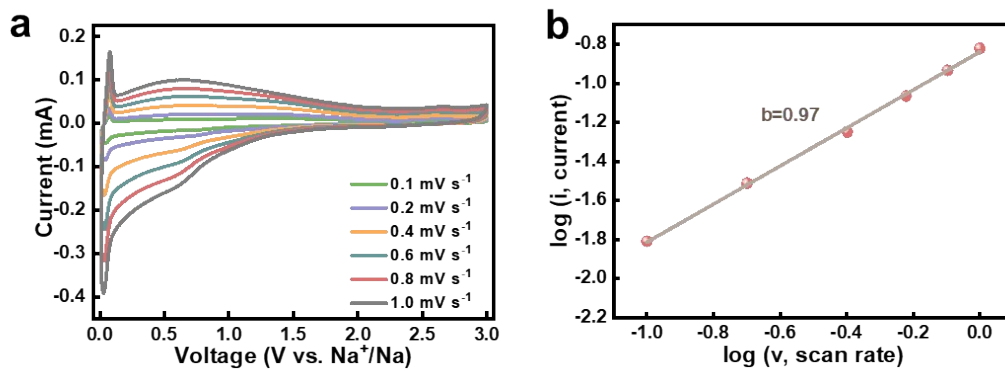

**Fig. S14.** a) CV curves at various scan rates, b) relationship between the peak currents and scan rates in logarithmic format of the  $\text{Nb}_2\text{O}_5@\text{C}$  composite in SIBs.

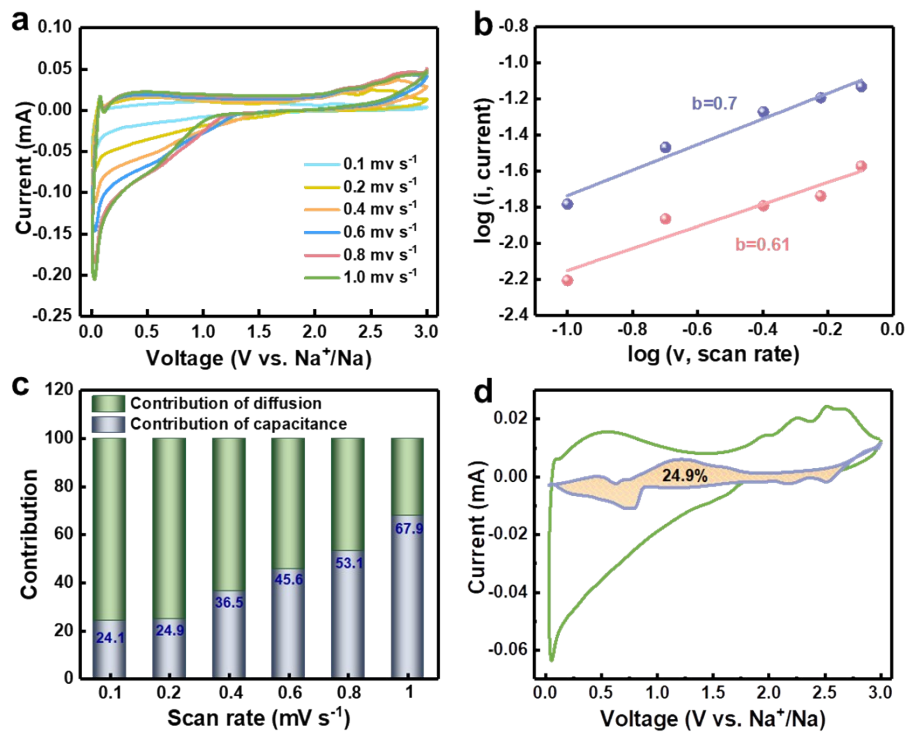

**Fig. S15.** Sodium-storage properties of the bare Nb<sub>2</sub>O<sub>5</sub> in half-cells: a) CV curves at various scan rates, b) relationship between the peak currents (anodic and cathodic peaks) and scan rates in logarithmic format, c) contribution ratios of the capacitive and diffusion-controlled behaviors, d) capacitive contribution (shaded area) in a CV curve at 0.2  $\text{mV s}^{-1}$ .

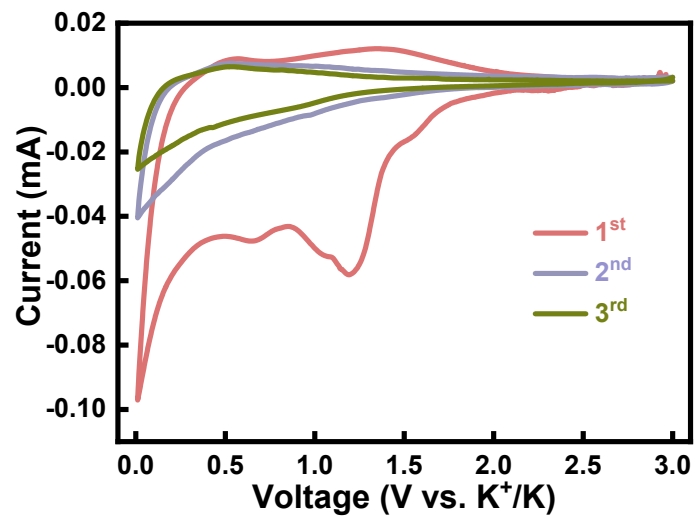

**Fig. S16.** CV curves of bare Nb<sub>2</sub>O<sub>5</sub> at the scan rate of 0.1 mV s<sup>-1</sup> between 0.01 and 3 V in the PIBs.



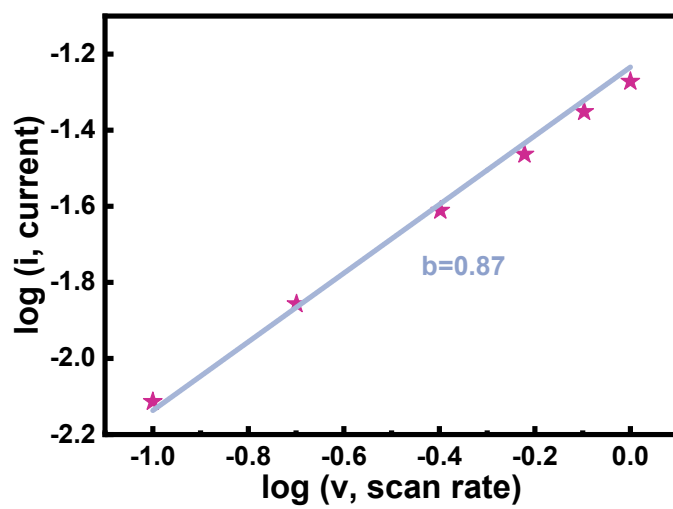

**Fig. S17.** Relationship between the peak currents and scan rates in logarithmic format of the Nb<sub>2</sub>O<sub>5</sub>@C composite in PIBs.

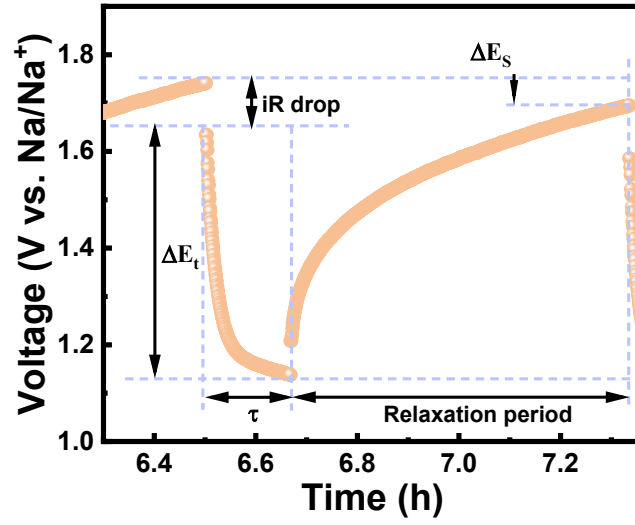

**Fig. S18.**  $E$  vs.  $t$  curve of the  $\text{Nb}_2\text{O}_5@\text{C}$  composite for a single GITT during discharge process.

The sodium diffusion coefficient ( $D_{\text{Na}^+}$ ) can be calculated using the following equation:

$$D = \frac{4}{\pi\tau} \left( \frac{mV_m}{M_A S} \right)^2 \left( \frac{\Delta E_S}{\Delta E_\tau} \right)^2$$

Where  $\tau$  (s),  $m$  (g),  $V_m$  ( $\text{cm}^3 \text{mol}^{-1}$ ),  $M_A$  ( $\text{g mol}^{-1}$ ) and  $S$  ( $\text{cm}^2$ ) are constant current pulse time, the active mass of electrode materials, molar volume of the active material, molecular weight and the effective surface area, respectively. And  $\Delta E_S$  (V) presents the difference in the steady state potential of the step at plateau, while  $\Delta E_\tau$  (V) is the total voltage change during a constant current pulse time excluding the  $iR$  drop as depicted in Fig. S18.

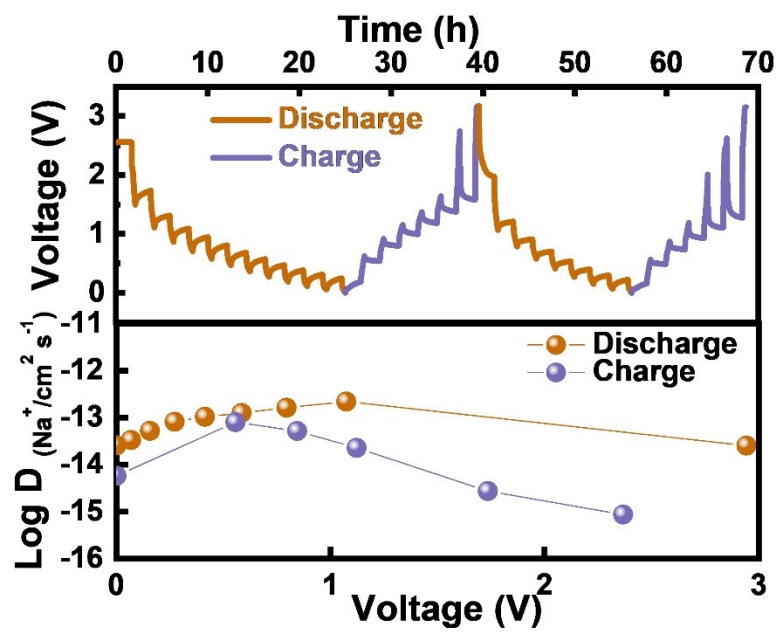

**Fig. S19.** The GITT curves and  $D_{Na^+}$  values at different discharge/charge states at the second cycle of bare  $Nb_2O_5$  in sodium ion battery.

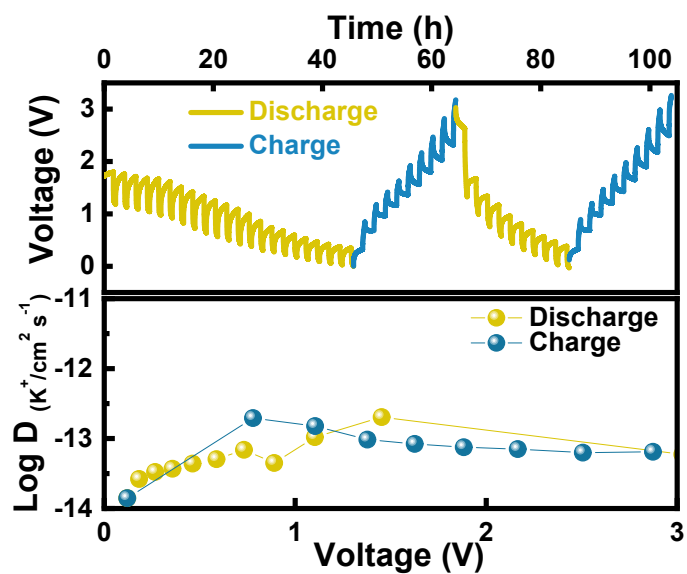

**Fig. S20.** The GITT curves and  $D_{K^+}$  values at different discharge/charge states at the second cycle of bare  $\text{Nb}_2\text{O}_5$  in potassium ion battery.

It can be found that the  $D_{K^+}$  values of  $\text{Nb}_2\text{O}_5@\text{C}$  at charge/discharge process are higher than that of bare  $\text{Nb}_2\text{O}_5$  whether in SIBs system or PIBs system, indicating the promoted ionic reaction kinetics stemmed from the rich high chemical activity of pyridinic N.

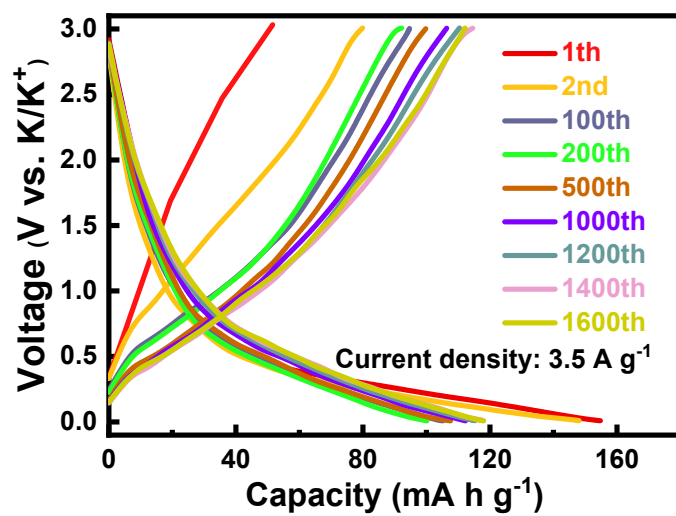

**Fig. S21.** Galvanostatic discharge/charge profiles of the different cycles of Nb<sub>2</sub>O<sub>5</sub>@C at the current density of 3.5 A g<sup>-1</sup> in PIBs.

**Table S1.** The fitted values of  $R_s$  and  $R_{ct}+R_f$  at different voltage within the first cycle of  $\text{Nb}_2\text{O}_5@\text{C}$  in SIBs.

| <b>Voltage</b>            | <b><math>R_s</math> (<math>\Omega</math>)</b> | <b><math>R_{ct} + R_f</math> (<math>\Omega</math>)</b> |
|---------------------------|-----------------------------------------------|--------------------------------------------------------|
| <b>OCV</b>                | 3.56                                          | 12.41                                                  |
| <b>Discharge to 1.5 V</b> | 3.48                                          | 12.87                                                  |
| <b>Discharge to 1.0 V</b> | 3.49                                          | 12.93                                                  |
| <b>Discharge to 0.5 V</b> | 3.47                                          | 12.54                                                  |
| <b>Charge to 0.01 V</b>   | 3.56                                          | 10.89                                                  |
| <b>Charge to 1 V</b>      | 3.51                                          | 8.92                                                   |
| <b>Charge to 2.5 V</b>    | 3.46                                          | 10.0                                                   |
| <b>Charge to 3.0 V</b>    | 3.34                                          | 9.5                                                    |

**Table S2.** The fitted values of  $R_s$  and  $R_{ct}+R_f$  at different voltage within the first cycle of  $\text{Nb}_2\text{O}_5@\text{C}$  in PIBs.

| <b>Voltage</b>            | <b><math>R_s</math> (<math>\Omega</math>)</b> | <b><math>R_{ct} + R_f</math> (<math>\Omega</math>)</b> |
|---------------------------|-----------------------------------------------|--------------------------------------------------------|
| <b>OCV</b>                | 0.2                                           | 994.9                                                  |
| <b>Discharge to 1.5 V</b> | 5.2                                           | 995.9                                                  |
| <b>Discharge to 1.0 V</b> | 6.1                                           | 792.0                                                  |
| <b>Discharge to 0.5 V</b> | 7.4                                           | 694.8                                                  |
| <b>Charge to 0.01 V</b>   | 1.2                                           | 566.2                                                  |
| <b>Charge to 1 V</b>      | 2.1                                           | 517.9                                                  |
| <b>Charge to 2.5 V</b>    | 0.1                                           | 495.2                                                  |
| <b>Charge to 3.0 V</b>    | 0.2                                           | 500.9                                                  |

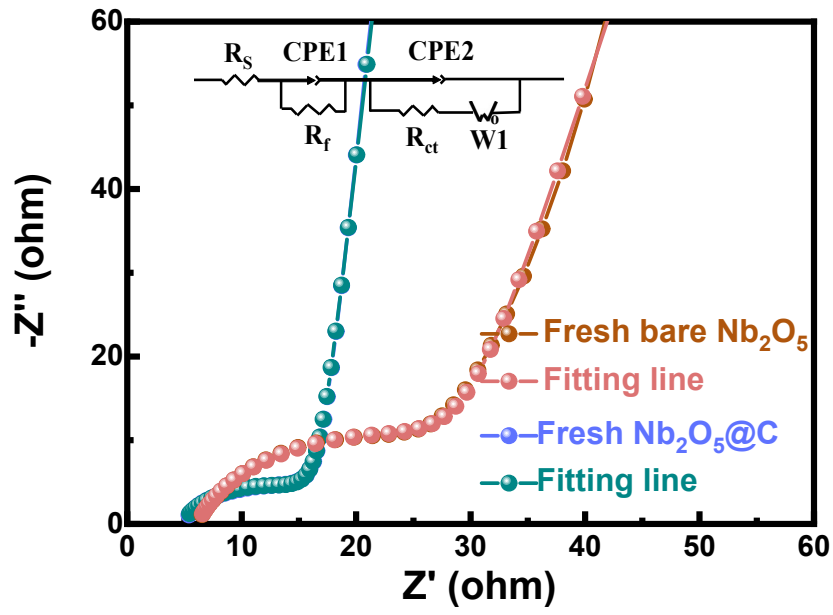

**Fig. S22.** The Nyquist plots of  $\text{Nb}_2\text{O}_5$  and  $\text{Nb}_2\text{O}_5@\text{C}$  before cycling in SIBs.



**Table S3.** The fitted values of solution resistance ( $R_s$ ) and the sum of charge transfer resistance and electrolyte/electrode interfacial resistance ( $R_{ct}+R_f$ ) of Nb<sub>2</sub>O<sub>5</sub> and Nb<sub>2</sub>O<sub>5</sub>@C before cycling in SIBs.

| Sample                            | $R_s$ ( $\Omega$ ) | $R_{ct}+R_f$ ( $\Omega$ ) |
|-----------------------------------|--------------------|---------------------------|
| Nb <sub>2</sub> O <sub>5</sub>    | 6.11               | 27.76                     |
| Nb <sub>2</sub> O <sub>5</sub> @C | 4.7                | 14.4                      |

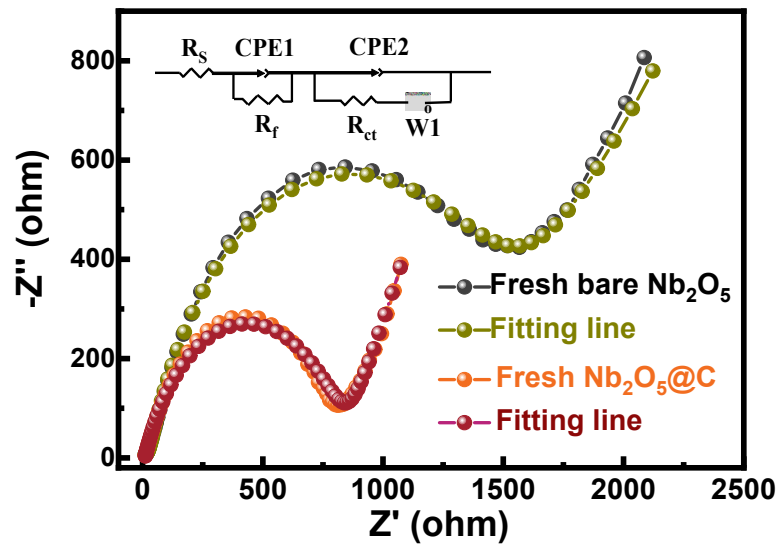

**Fig. S23.** The Nyquist plots of  $\text{Nb}_2\text{O}_5$  and  $\text{Nb}_2\text{O}_5@\text{C}$  before cycling in PIBs.

**Table S4.** The fitted values of  $R_s$  and  $R_{ct}+R_f$  of  $\text{Nb}_2\text{O}_5$  and  $\text{Nb}_2\text{O}_5@\text{C}$  before cycling in PIBs.

| <b>Sample</b>                    | $R_s$ ( $\Omega$ ) | $R_{ct}+R_f$ ( $\Omega$ ) |
|----------------------------------|--------------------|---------------------------|
| $\text{Nb}_2\text{O}_5$          | 9.2                | 1393.5                    |
| $\text{Nb}_2\text{O}_5@\text{C}$ | 6.7                | 828.1                     |

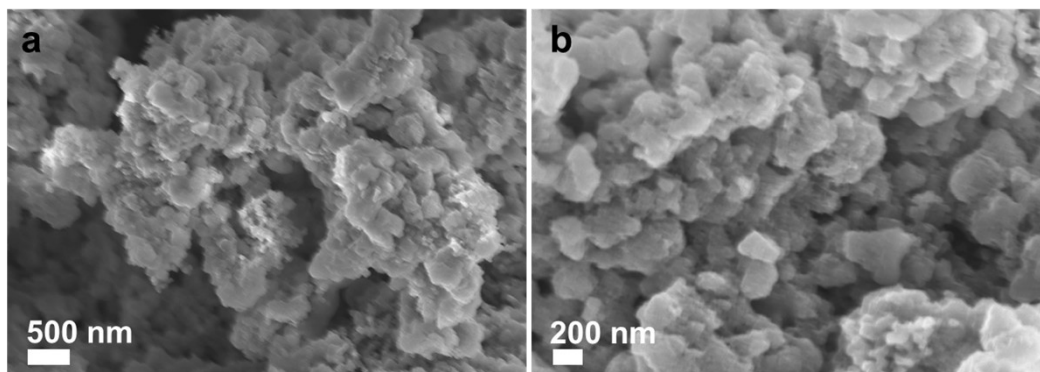

**Fig. S24.** (a, b) SEM images of  $\text{Nb}_2\text{O}_5@\text{C}$  tested after 200 cycles at a current density of  $1 \text{ A g}^{-1}$  in SIBs.

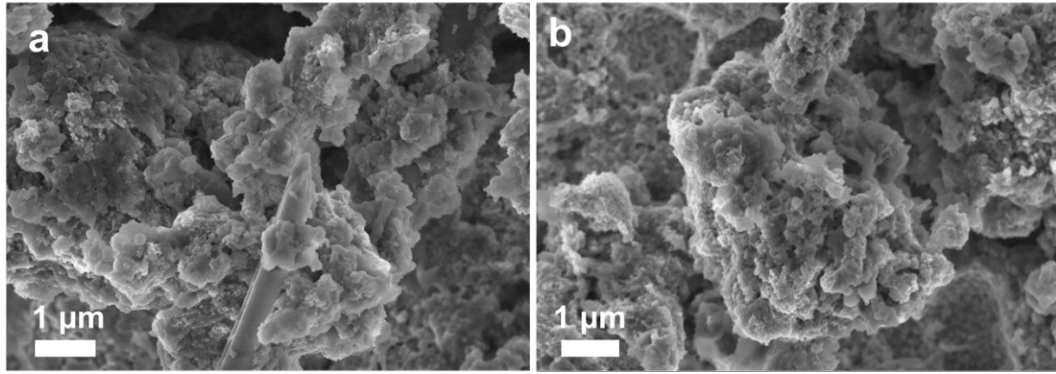

**Fig. S25.** (a, b) SEM images of  $\text{Nb}_2\text{O}_5@\text{C}$  tested after 500 cycles at a current density  $0.5 \text{ A g}^{-1}$  in PIBs.

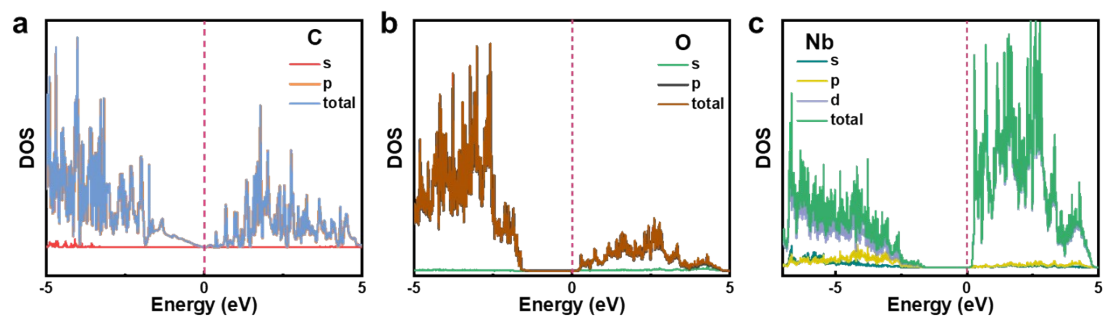

**Fig. S26.** The DOS of C, O and Nb.

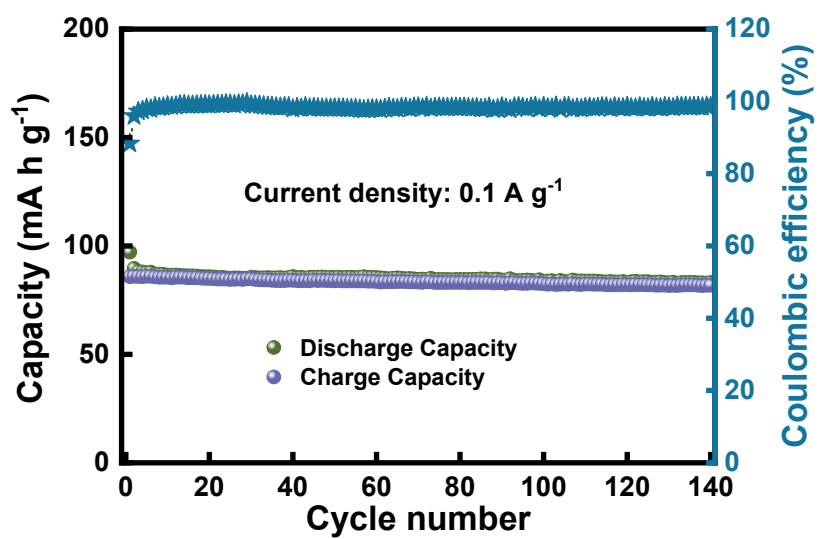

**Fig. S27.** The cycling performance of the commercial  $\text{Na}_3\text{V}_2(\text{PO}_4)_3$  at  $0.1 \text{ A g}^{-1}$ .

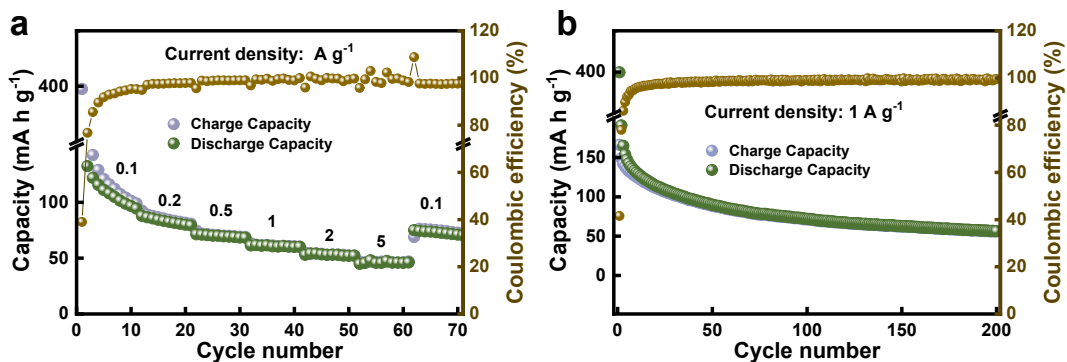

**Fig. S28.** (a) Rate capability and (b) cycling performance at 1 A g<sup>-1</sup> of the  $\text{Na}_3\text{V}_2(\text{PO}_4)_3//\text{Nb}_2\text{O}_5@\text{C}$  full cell in the voltage window of 1 - 3.5 V.

**Fig. S28a** displays the rate performance of the  $\text{Na}_3\text{V}_2(\text{PO}_4)_3//\text{Nb}_2\text{O}_5@\text{C}$  full cell in a voltage window of 1 - 3.5 V, showing the capacities of 104.8, 82.5, 69.5, 60.4, 53.1, and 45.8 mA h g<sup>-1</sup> at 0.1, 0.2, 0.5, 1, 2 and 5 A g<sup>-1</sup>, respectively. And the capacity bounced back to 73.8 mA h g<sup>-1</sup> once the current density recovered to 100 mA g<sup>-1</sup>. **Fig. S28b** presents the long-term cycling performance of the full cell, which maintained a capacity of 56.8 mA h g<sup>-1</sup> at 1 A g<sup>-1</sup> over 200 cycles with a Coulombic efficiency closed to 100%.



**Table S5.** Comparison of the rate capability and cycling performance of Nb<sub>2</sub>O<sub>5</sub>-based composites employed as active material for sodium/potassium-ion electrodes.

| Materials                                |      | Cycling performance (mA h g <sup>-1</sup> )                                                                                                     | Rate Capability (mA h g <sup>-1</sup> )                                                                                                                                                                                       | Ref. |
|------------------------------------------|------|-------------------------------------------------------------------------------------------------------------------------------------------------|-------------------------------------------------------------------------------------------------------------------------------------------------------------------------------------------------------------------------------|------|
| 600-Nb <sub>2</sub> O <sub>5</sub> @NC-2 | SIBs | 278 after 100 cycles at 0.1 A g <sup>-1</sup><br>128 after 3000 cycles at 5 A g <sup>-1</sup><br>95.9 after 3000 cycles at 10 A g <sup>-1</sup> | 280 at 0.1 A g <sup>-1</sup><br>250 at 0.2 A g <sup>-1</sup><br>225 at 0.5 A g <sup>-1</sup><br>200 at 1 A g <sup>-1</sup><br>166 at 2 A g <sup>-1</sup><br>130 at 5 A g <sup>-1</sup><br>98 at 10 A g <sup>-1</sup>          | 1    |
| Nb <sub>2</sub> O <sub>5</sub> NCs/rGO   | SIBs | 181 after 100 cycles at 0.2 A g <sup>-1</sup>                                                                                                   | 195 at 0.5 A g <sup>-1</sup><br>170 at 1 A g <sup>-1</sup><br>143 at 2 A g <sup>-1</sup><br>115 at 5 A g <sup>-1</sup><br>85 at 10 A g <sup>-1</sup>                                                                          | 2    |
| Nb <sub>2</sub> O <sub>5</sub> @3D PRS   | SIBs | 130 after 7500 cycles at 10 C                                                                                                                   | 302 at 0.5 C<br>265 at 1 C<br>240 at 2 C<br>225 at 3 C<br>202 at 5 C<br>176 at 8 C<br>158 at 10 C<br>140 at 15 C<br>126 at 20 C<br>108 at 25 C                                                                                | 3    |
| T-Nb <sub>2</sub> O <sub>5</sub> /CNF    | SIBs | 150 after 5000 cycles at 1 A g <sup>-1</sup>                                                                                                    | 229 at 0.1 A g <sup>-1</sup><br>189.8 at 0.2 A g <sup>-1</sup><br>162.9 at 0.5 A g <sup>-1</sup><br>145.7 at 1 A g <sup>-1</sup><br>129.4 at 2 A g <sup>-1</sup><br>113.3 at 4 A g <sup>-1</sup><br>97 at 8 A g <sup>-1</sup> | 4    |

|                                                                |                       |                                                                                                         |                                                                                                                                                                                                                                                               |    |
|----------------------------------------------------------------|-----------------------|---------------------------------------------------------------------------------------------------------|---------------------------------------------------------------------------------------------------------------------------------------------------------------------------------------------------------------------------------------------------------------|----|
| <b>m-Nb<sub>2</sub>O<sub>5</sub>/C</b>                         | SIBs                  | 252 after 200 cycles<br>at 0.05 A g <sup>-1</sup><br>125 after 1000 cycles<br>at 1 A g <sup>-1</sup>    | 252 at 0.05 A g <sup>-1</sup><br>123 at 1 A g <sup>-1</sup><br>80 at 2 A g <sup>-1</sup>                                                                                                                                                                      | 5  |
| <b>S-Nb<sub>2</sub>O<sub>5</sub> HNS@S-<br/>rGO</b>            | SIBs                  | 215 after 100 cycles<br>at 0.5 C<br>140 after 1000 cycles<br>at 5 C<br>100 after 3000 cycles<br>at 20 C | 290 at 0.25 C<br>260 at 0.5 C<br>230 at 1 C<br>180 at 2.5 C<br>155 at 5 C<br>125 at 10 C<br>100 at 20 C                                                                                                                                                       | 6  |
| <b>T-Nb<sub>2</sub>O<sub>5-x</sub>F<sub>y</sub>∞C-<br/>NBs</b> | SIBs                  | 239 after 100 cycles<br>at 0.05 A g <sup>-1</sup><br>130 after 10000<br>cycles at 1 A g <sup>-1</sup>   | 318 at 0.025 A g <sup>-1</sup><br>292.2 at 0.05 A g <sup>-1</sup><br>264 at 0.1 A g <sup>-1</sup><br>230 at 0.2 A g <sup>-1</sup><br>194 at 0.4 A g <sup>-1</sup><br>178 at 0.8 A g <sup>-1</sup><br>165 at 1 A g <sup>-1</sup><br>141 at 2 A g <sup>-1</sup> | 7  |
| <b>a-H-Nb<sub>2</sub>O<sub>5</sub></b>                         | SIBs                  | 133 after 1000 cycles<br>at 2 C<br>109 after 3000 cycles<br>at 5 C                                      | 185 at 0.5 C<br>181 at 1 C<br>159 at 2 C<br>117 at 5 C<br>84 at 10 C                                                                                                                                                                                          | 8  |
| <b>m-Nb<sub>2</sub>O<sub>5</sub>/CNF</b>                       | SIBs                  | 190.6 after 2500<br>cycles at 10 C<br>175.8 after 3000<br>cycles at 5 C                                 | 286.8 at 0.5 C<br>282.2 at 1 C<br>260.1 at 2.5 C<br>243.9 at 5 C<br>224 at 10 C<br>196.4 at 25 C<br>185.6 at 50 C<br>178.6 at 100 C<br>171.4 at 150 C                                                                                                         | 9  |
| <b>Sb-Nb<sub>2</sub>O<sub>5</sub><br/>nanomeshes</b>           | SIBs<br>(0.01-2<br>V) | 190 after 500 cycles<br>at 5 A g <sup>-1</sup>                                                          | 270 at 2 A g <sup>-1</sup>                                                                                                                                                                                                                                    | 10 |

|                                                                |      |                                                                                                                                                                      |                                                                                                                                                                                                                                                    |                      |
|----------------------------------------------------------------|------|----------------------------------------------------------------------------------------------------------------------------------------------------------------------|----------------------------------------------------------------------------------------------------------------------------------------------------------------------------------------------------------------------------------------------------|----------------------|
| <b>Nb<sub>2</sub>O<sub>5</sub>@MoS<sub>2</sub>@C<br/>CNFs</b>  | SIBs | About 190 after 1000<br>cycles at 1 A g <sup>-1</sup><br>127 after 20000<br>cycles at 5 A g <sup>-1</sup>                                                            | 245 at 0.2 A g <sup>-1</sup><br>220 at 0.5 A g <sup>-1</sup><br>201 at 1 A g <sup>-1</sup><br>180 at 2 A g <sup>-1</sup><br>155 at 5 A g <sup>-1</sup><br>133 at 10 A g <sup>-1</sup><br>115 at 15 A g <sup>-1</sup><br>97 at 20 A g <sup>-1</sup> | 11                   |
| <b>black Nb<sub>2</sub>O<sub>5</sub>-<br/>x@rGO nanosheets</b> | SIBs | 150 after 2000 cycles<br>at 1 A g <sup>-1</sup>                                                                                                                      | 202 at 0.5 A g <sup>-1</sup><br>152 at 1.5 A g <sup>-1</sup><br>123 at 3 A g <sup>-1</sup>                                                                                                                                                         | 12                   |
|                                                                | PIBs | About 150 after 200<br>cycles at 0.2 A g <sup>-1</sup><br>About 120 after 500<br>cycles at 0.5 A g <sup>-1</sup><br>81 after 3500 cycles<br>at 1.5 A g <sup>-1</sup> | 111 at 1 A g <sup>-1</sup>                                                                                                                                                                                                                         |                      |
| <b>Nb<sub>2</sub>O<sub>5</sub><br/>NRs/NMMCNF</b>              | SIBs | 126 after 10000<br>cycles at 2 A g <sup>-1</sup>                                                                                                                     | 275 at 0.02 A g <sup>-1</sup><br>101 at 4 A g <sup>-1</sup>                                                                                                                                                                                        | 13                   |
| <b>T-Nb<sub>2</sub>O<sub>5</sub><br/>nanowires</b>             | PIBs | 104 after 400 cycles<br>at 0.4 A g <sup>-1</sup>                                                                                                                     | 152 at 0.1 A g <sup>-1</sup><br>127 at 0.2 A g <sup>-1</sup><br>104 at 0.4 A g <sup>-1</sup><br>90 at 0.6 A g <sup>-1</sup><br>81 at 0.8 A g <sup>-1</sup><br>74 at 1 A g <sup>-1</sup>                                                            | 14                   |
| <b>Nb<sub>2</sub>O<sub>5</sub>@C</b>                           | SIBs | <b>255 after 150 cycles<br/>at 1 A g<sup>-1</sup><br/>160.7 after 1000<br/>cycles at 10 A g<sup>-1</sup></b>                                                         | <b>352.4 at 0.2 A g<sup>-1</sup><br/>299 at 0.5 A g<sup>-1</sup><br/>259 at 1 A g<sup>-1</sup><br/>225 at 2 A g<sup>-1</sup><br/>191 at 5 A g<sup>-1</sup><br/>163 at 10 A g<sup>-1</sup></b>                                                      | <b>This<br/>work</b> |
|                                                                | PIBs | <b>143 after 500 cycles<br/>at 0.5 A g<sup>-1</sup><br/>118 after 1600<br/>cycles at 3.5 A g<sup>-1</sup></b>                                                        | <b>237 at 0.1 A g<sup>-1</sup><br/>175 at 0.2 A g<sup>-1</sup><br/>140 at 0.5 A g<sup>-1</sup><br/>114 at 1 A g<sup>-1</sup><br/>91 at 2 A g<sup>-1</sup></b>                                                                                      |                      |

|  |  |  |                                                                        |  |
|--|--|--|------------------------------------------------------------------------|--|
|  |  |  | <b>70.5 at 3.5 A g<sup>-1</sup></b><br><b>53 at 5 A g<sup>-1</sup></b> |  |
|--|--|--|------------------------------------------------------------------------|--|

## Reference

1. Z. Chen, W. Chen, H. Wang, Z. Xiao and F. Yu, *Nanoscale*, 2020, **12**, 18673-18681.
2. L. Yan, G. Chen, S. Sarker, S. Richins, H. Wang, W. Xu, X. Rui and H. Luo, *ACS Appl. Mater. Interfaces*, 2016, **8**, 22213-22219.
3. H. Yang, R. Xu, Y. Gong, Y. Yao, L. Gu and Y. Yu, *Nano Energy*, 2018, **48**, 448-455.
4. L. Yang, Y.-E. Zhu, J. Sheng, F. Li, B. Tang, Y. Zhang and Z. Zhou, *Small*, 2017, **13**, 1702588.
5. Y. Wu, X. Fan, R. R. Gaddam, Q. Zhao, D. Yang, X. Sun, C. Wang and X. S. Zhao, *J. Power Sources*, 2018, **408**, 82-90.
6. F. Liu, X. Cheng, R. Xu, Y. Wu, Y. Jiang and Y. Yu, *Adv. Funct. Mater.*, 2018, **28**, 1800394.
7. Y. Wu, X. Fan, Y. Chen, R. R. Gaddam, F. Yu, C. Xiao, C. Lin, Q. Zhao, X. Sun, H. Wang, C. Liu, J. Li and X. S. Zhao, *J. Mater. Chem. A*, 2019, **7**, 20813-20823.
8. J. Ni, W. Wang, C. Wu, H. Liang, J. Maier, Y. Yu and L. Li, *Adv. Mater.*, 2017, **29**, 1605607.
9. Y. Li, H. Wang, L. Wang, Z. Mao, R. Wang, B. He, Y. Gong and X. Hu, *Small*, 2019, **15**, 1804539.
10. L. Wang, X. Bi and S. Yang, *J. Mater. Chem. A*, 2018, **6**, 6225-6232.
11. Q. Deng, F. Chen, S. Liu, A. Bayaguud, Y. Feng, Z. Zhang, Y. Fu, Y. Yu and C. Zhu, *Adv. Funct. Mater.*, 2020, **30**, 1908665.
12. Z. Tong, R. Yang, S. Wu, D. Shen, T. Jiao, K. Zhang, W. Zhang and C.-S. Lee, *Small*, 2019, **15**, 1901272.

13. L. She, F. Zhang, C. Jia, L. Kang, Q. Li, X. He, J. Sun, Z. Lei and Z.-H. Liu, *J. Colloid Interface Sci.*, 2020, **573**, 1-10.
14. N. Li, F. Zhang and Y. Tang, *J. Mater. Chem. A*, 2018, **6**, 17889-17895.
